# Supplementary material for: Association of Oxymetazoline Hydrochloride, 0.1%, Solution Administration With Visual Field in Acquired Ptosis: A Pooled Analysis of 2 Randomized Clinical Trials
Source: PubMed Central journal article supplement — JAMA Ophthalmol. 2020 Oct 1;138(11):1168–75. doi: 10.1001/jamaophthalmol.2020.3812 (PMC7530825; doi:10.1001/jamaophthalmol.2020.3812), 2020-10-01
Supplement: jamaophthalmol-e203812-s001.pdf [file jamaophthalmol-e203812-s001.pdf]

## Supplemental Online Content

Slonim CB, Foster S, Jaros M, et al. Association of oxymetazoline hydrochloride, 0.1%, solution administration with visual field in acquired ptosis: a pooled analysis of 2 randomized clinical trials. *JAMA Ophthalmol*. Published online October 1, 2020. doi:10.1001/jamaophthalmol.2020.3812

### eMethods

**eTable 1.** Subject disposition and demographics, individual studies included in pooled analysis

**eTable 2.** Primary (mean change from baseline in the number of points seen in the top 4 rows on the Leicester Peripheral Field Test (LPFT)) and secondary (mean change from baseline in Marginal Reflex Distance 1 (MRD-1)) efficacy outcomes, individual studies included in pooled analysis

**eTable 3.** Summary of treatment-emergent adverse events (TEAEs), individual studies included in pooled analysis

This supplemental material has been provided by the authors to give readers additional information about their work.

## **eMethods**

### **Definition of study eye**

For enrolled subjects, both eyes were evaluated, and the eye with the smaller MRD-1 was defined as the study eye. If MRD-1 was the same in both eyes, the eye with the greater visual field deficit was defined as the study eye. If ptosis was present in both eyes and MRD-1 was  $\leq 0$  in one eye, then the eye with measurable MRD-1 ( $\geq 0.5$  mm) was defined as the study eye.

### **Randomization**

Randomization schemes were created by an independent biostatistician using a block design. Study sites accessed the Interactive Web Response System to randomize subjects to study treatment and to assign the study medication kit to be dispensed. Drug kit and randomization numbers were recorded in each subject's electronic case report form.

**eTable 1.** Subject disposition and demographics, individual studies included in pooled analysis.

|                                                           | Study RVL-1201-201<br>(N=140) |                   | Study RVL-1201-202<br>(N=164) |                   |
|-----------------------------------------------------------|-------------------------------|-------------------|-------------------------------|-------------------|
|                                                           | Oxymetazoline 0.1%<br>(n=94)  | Vehicle<br>(n=46) | Oxymetazoline 0.1%<br>(n=109) | Vehicle<br>(n=55) |
| <b>Subjects enrolled</b>                                  | 94                            | 46                | 109                           | 55                |
| <b>Subjects completing all visits, n (%)</b>              | 90 (95.7%)                    | 45 (97.8%)        | 108 (99.1%)                   | 53 (96.4%)        |
| <b>Compliance with treatment, mean % (SD)<sup>a</sup></b> | 97.4 (11.9)                   | 95.7 (15.0)       | 98.7 (4.5)                    | 98.5 (4.4)        |
| <b>Treatment exposure, mean days (SD)</b>                 | 41.6 (6.4)                    | 42.7 (1.6)        | 42.4 (2.9)                    | 41.6 (7.0)        |
| <b>Age, years</b>                                         |                               |                   |                               |                   |
| Mean (SD)                                                 | 64.7 (12.2)                   | 65.5 (12.5)       | 63.6 (14.3)                   | 63.3 (16.5)       |
| Min, max                                                  | 22, 83                        | 26, 85            | 20, 92                        | 14, 85            |
| <b>Sex, n (%)</b>                                         |                               |                   |                               |                   |
| Female                                                    | 74 (78.7%)                    | 32 (69.6%)        | 77 (70.6%)                    | 39 (70.9%)        |
| Male                                                      | 20 (21.3%)                    | 14 (30.4%)        | 32 (29.4%)                    | 16 (29.1%)        |
| <b>Race, n (%)</b>                                        |                               |                   |                               |                   |
| White                                                     | 78 (83.0%)                    | 42 (91.3%)        | 99 (90.8%)                    | 50 (90.9%)        |
| Black                                                     | 12 (12.8%)                    | 3 (6.5%)          | 6 (5.5%)                      | 3 (5.5%)          |
| Asian                                                     | 2 (2.1%)                      | 1 (2.2%)          | 4 (3.7%)                      | 2 (3.6%)          |
| American Indian                                           | 2 (2.1%)                      | 0                 | 0                             | 0                 |
| <b>Ethnicity, n (%)</b>                                   |                               |                   |                               |                   |

|                                                                                                                                                                                                                                           |             |             |             |             |
|-------------------------------------------------------------------------------------------------------------------------------------------------------------------------------------------------------------------------------------------|-------------|-------------|-------------|-------------|
| Not Hispanic/Latino                                                                                                                                                                                                                       | 74 (78.7%)  | 35 (76.1%)  | 96 (88.1%)  | 49 (89.1%)  |
| Hispanic/Latino                                                                                                                                                                                                                           | 20 (21.3%)  | 11 (23.9%)  | 13 (11.9%)  | 6 (10.9%)   |
| <b>Baseline points seen, top 4 rows, LPFT</b>                                                                                                                                                                                             |             |             |             |             |
| Mean (SD)                                                                                                                                                                                                                                 | 17.0 (4.4)  | 16.9 (5.2)  | 17.6 (4.9)  | 17.6 (5.5)  |
| Median                                                                                                                                                                                                                                    | 17.0        | 17.0        | 18.0        | 18.0        |
| Minimum, maximum                                                                                                                                                                                                                          | 8, 27       | 2, 25       | 8, 27       | 10, 26      |
| <b>Baseline MRD-1, mm</b>                                                                                                                                                                                                                 |             |             |             |             |
| Mean (SD)                                                                                                                                                                                                                                 | 1.16 (0.66) | 1.03 (0.68) | 1.04 (0.74) | 1.07 (0.70) |
| Median                                                                                                                                                                                                                                    | 1.00        | 1.00        | 1.00        | 1.00        |
| Minimum, maximum                                                                                                                                                                                                                          | 0.0, 3.0    | 0.0, 2.0    | 0.0, 2.0    | 0.0, 2.0    |
| LPFT, Leicester Peripheral Field Test; MRD-1, Marginal Reflex Distance; SD, standard deviation<br><sup>a</sup> Percentage of opened vials returned relative to the number of vials that should have been used during the treatment period |             |             |             |             |

**eTable 2.** Primary (mean change from baseline in the number of points seen in the top 4 rows on the Leicester Peripheral Field Test (LPFT)) and secondary (mean change from baseline in Marginal Reflex Distance 1 (MRD-1)) efficacy outcomes, individual studies included in pooled analysis.

|                                                | Study RVL-1201-201<br>(N=140) |                   | Study RVL-1201-202<br>(N=164) |                   |
|------------------------------------------------|-------------------------------|-------------------|-------------------------------|-------------------|
|                                                | Oxymetazoline 0.1%<br>(n=94)  | Vehicle<br>(n=46) | Oxymetazoline 0.1%<br>(n=109) | Vehicle<br>(n=55) |
| <b>LPFT</b>                                    |                               |                   |                               |                   |
| <b>Points at baseline, mean (SD)</b>           | 17.0 (4.4)                    | 16.9 (5.2)        | 17.6 (4.9)                    | 17.6 (5.5)        |
| <b>Day 1, hour 6</b>                           |                               |                   |                               |                   |
| Change from baseline, mean (SD)                | 5.2 (6.0)                     | 1.5 (3.9)         | 6.3 (6.7)                     | 2.1 (4.3)         |
| Mean difference (95% CI), p value <sup>a</sup> | 3.67 (2.00, 5.34), p < 0.0001 |                   | 4.23 (2.36, 6.09), p < 0.0001 |                   |
| <b>Day 14, hour 2</b>                          |                               |                   |                               |                   |
| Change from baseline, mean (SD)                | 6.4 (5.0)                     | 2.2 (5.8)         | 7.7 (6.4)                     | 2.4 (5.3)         |
| Mean difference (95% CI), p value <sup>a</sup> | 4.20 (2.30, 6.10), p < 0.0001 |                   | 5.30 (3.45, 7.14), p < 0.0001 |                   |
| <b>MRD-1</b>                                   |                               |                   |                               |                   |
| <b>Baseline MRD-1, mean mm (SD)</b>            | 1.16 (0.66)                   | 1.03 (0.58)       | 1.04 (0.74)                   | 1.07 (0.70)       |
| <b>Day 1, hour 6</b>                           |                               |                   |                               |                   |
| Change from baseline, mean (SD)                | 0.94 (0.92)                   | 0.67 (1.00)       | 0.98 (0.87)                   | 0.35 (0.57)       |
| Mean difference (95% CI), p value <sup>a</sup> | 0.27 (-0.07, 0.61), p = 0.028 |                   | 0.61 (0.37, 0.86), p < 0.0001 |                   |

|                                                                                                                                                                        |                               |             |                               |             |
|------------------------------------------------------------------------------------------------------------------------------------------------------------------------|-------------------------------|-------------|-------------------------------|-------------|
| <b>Day 14, hour 2</b>                                                                                                                                                  |                               |             |                               |             |
| Change from baseline, mean (SD)                                                                                                                                        | 1.09 (0.80)                   | 0.58 (0.88) | 1.22 (0.93)                   | 0.43 (0.73) |
| Mean difference (95% CI), p value <sup>a</sup>                                                                                                                         | 0.52 (0.22, 0.81), p = 0.0004 |             | 0.78 (0.50, 1.06), p < 0.0001 |             |
| CI, confidence interval; SD, standard deviation<br><sup>a</sup> p versus vehicle, from ANCOVA model with treatment as a fixed factor and baseline score as a covariate |                               |             |                               |             |

**eTable 3.** Summary of treatment-emergent adverse events (TEAEs), individual studies included in pooled analysis.

|                                                                                 | Study RVL-1201-201<br>(N=140) |                   | Study RVL-1201-202<br>(N=164) |                   |
|---------------------------------------------------------------------------------|-------------------------------|-------------------|-------------------------------|-------------------|
|                                                                                 | Oxymetazoline 0.1%<br>(n=94)  | Vehicle<br>(n=46) | Oxymetazoline 0.1%<br>(n=109) | Vehicle<br>(n=55) |
| <b>Subjects reporting any TEAE, n (%)</b>                                       | 29 (30.9%)                    | 15 (32.6%)        | 35 (32.1%)                    | 21 (38.2%)        |
| <b>Total TEAEs reported</b>                                                     | 65                            | 27                | 65                            | 46                |
| <b>Subjects reporting TEAE by number of TEAEs, n (%)</b>                        |                               |                   |                               |                   |
| 0 TEAEs                                                                         | 65 (69.1%)                    | 31 (67.4%)        | 74 (67.9%)                    | 34 (61.8%)        |
| 1 TEAE                                                                          | 9 (9.6%)                      | 9 (19.6%)         | 15 (13.8%)                    | 9 (16.4%)         |
| >1 TEAE                                                                         | 20 (21.3%)                    | 6 (13.0%)         | 20 (18.3%)                    | 12 (21.8%)        |
| <b>Subjects reporting TEAE by maximum intensity, n (%)<sup>a</sup></b>          |                               |                   |                               |                   |
| Mild                                                                            | 23 (24.5%)                    | 9 (19.6%)         | 29 (26.6%)                    | 16 (29.1%)        |
| Moderate                                                                        | 4 (4.3%)                      | 6 (13.0%)         | 6 (5.5%)                      | 5 (9.1%)          |
| Severe                                                                          | 2 (2.1%)                      | 0                 | 0                             | 0                 |
| <b>Subjects reporting TEAE by relationship to study drug, n (%)<sup>b</sup></b> |                               |                   |                               |                   |
| Not suspected                                                                   | 18 (19.1%)                    | 11 (23.9%)        | 22 (20.2%)                    | 16 (29.1%)        |
| Suspected                                                                       | 11 (11.7%)                    | 4 (8.7%)          | 13 (11.9%)                    | 5 (9.1%)          |
| <b>Subjects reporting any serious TEAE, n (%)</b>                               | 1 (1.1%)                      | 0                 | 1 (0.9%)                      | 1 (1.8%)          |
| <b>Subjects reporting any TEAE leading to discontinuation, n (%)</b>            | 3 (3.2%)                      | 1 (2.2%)          | 1 (0.9%)                      | 1 (1.8%)          |

| TEAEs reported for ≥2% of subjects, by MedDRA Preferred Term, events:n (%)                                                                                                                                                                                                                    |             |            |             |            |
|-----------------------------------------------------------------------------------------------------------------------------------------------------------------------------------------------------------------------------------------------------------------------------------------------|-------------|------------|-------------|------------|
| Punctate keratitis                                                                                                                                                                                                                                                                            | 11:7 (7.4%) | 2:2 (4.3%) | 8:4 (3.7%)  | 1:1 (1.8%) |
| Vision blurred                                                                                                                                                                                                                                                                                | 10:5 (5.3%) | 0:0        | 2:2 (1.8%)  | 0:0        |
| Ocular hyperemia                                                                                                                                                                                                                                                                              | 5:3 (3.2%)  | 0:0        | 0:0         | 0:0        |
| Conjunctival hyperemia                                                                                                                                                                                                                                                                        | 0:0         | 0:0        | 10:6 (5.5%) | 2:1 (1.8%) |
| Eye pain                                                                                                                                                                                                                                                                                      | 0:0         | 0:0        | 4:3 (2.8%)  | 0:0        |
| Eye pruritus                                                                                                                                                                                                                                                                                  | 0:0         | 2:1 (2.2%) | 0:0         | 4:2 (3.6%) |
| Vitreous detachment                                                                                                                                                                                                                                                                           | 0:0         | 2:2 (4.3%) | 0:0         | 0:0        |
| Instillation site pain                                                                                                                                                                                                                                                                        | 8:4 (4.3%)  | 0:0        | 3:2 (1.8%)  | 0:0        |
| Instillation site complication                                                                                                                                                                                                                                                                | 2:1 (1.1%)  | 0:0        | 0:0         | 4:2 (3.6%) |
| Upper respiratory tract infection                                                                                                                                                                                                                                                             | 2:2 (2.1%)  | 1:1 (2.2%) | 0:0         | 1:1 (1.8%) |
| Vital dye staining on cornea                                                                                                                                                                                                                                                                  | 4:2 (2.1%)  | 0:0        | 2:1 (0.9%)  | 4:3 (5.5%) |
| Headache                                                                                                                                                                                                                                                                                      | 2:2 (2.1%)  | 0:0        | 0:0         | 1:1 (1.8%) |
| <p>MedDRA, Medial Dictionary for Regulatory Activities</p> <p><sup>a</sup> Subjects reporting ≥1 TEAE counted once at the maximum intensity of all reported TEAEs</p> <p><sup>b</sup> Subjects reporting the same TEAE at more than one relationship counted at the greatest relationship</p> |             |            |             |            |
